# Supplementary figures and images for: The Role of Histamine Degradation Gene Polymorphisms in Moderating the Effects of Food Additives on Children's ADHD Symptoms
Source: Atypon-hosted journal article supplement (doi:10.1176/appi.ajp.2010.09101529), 2010-06-15

**Figure S1.** CONSORT diagram of enlistment of 3 year old participants

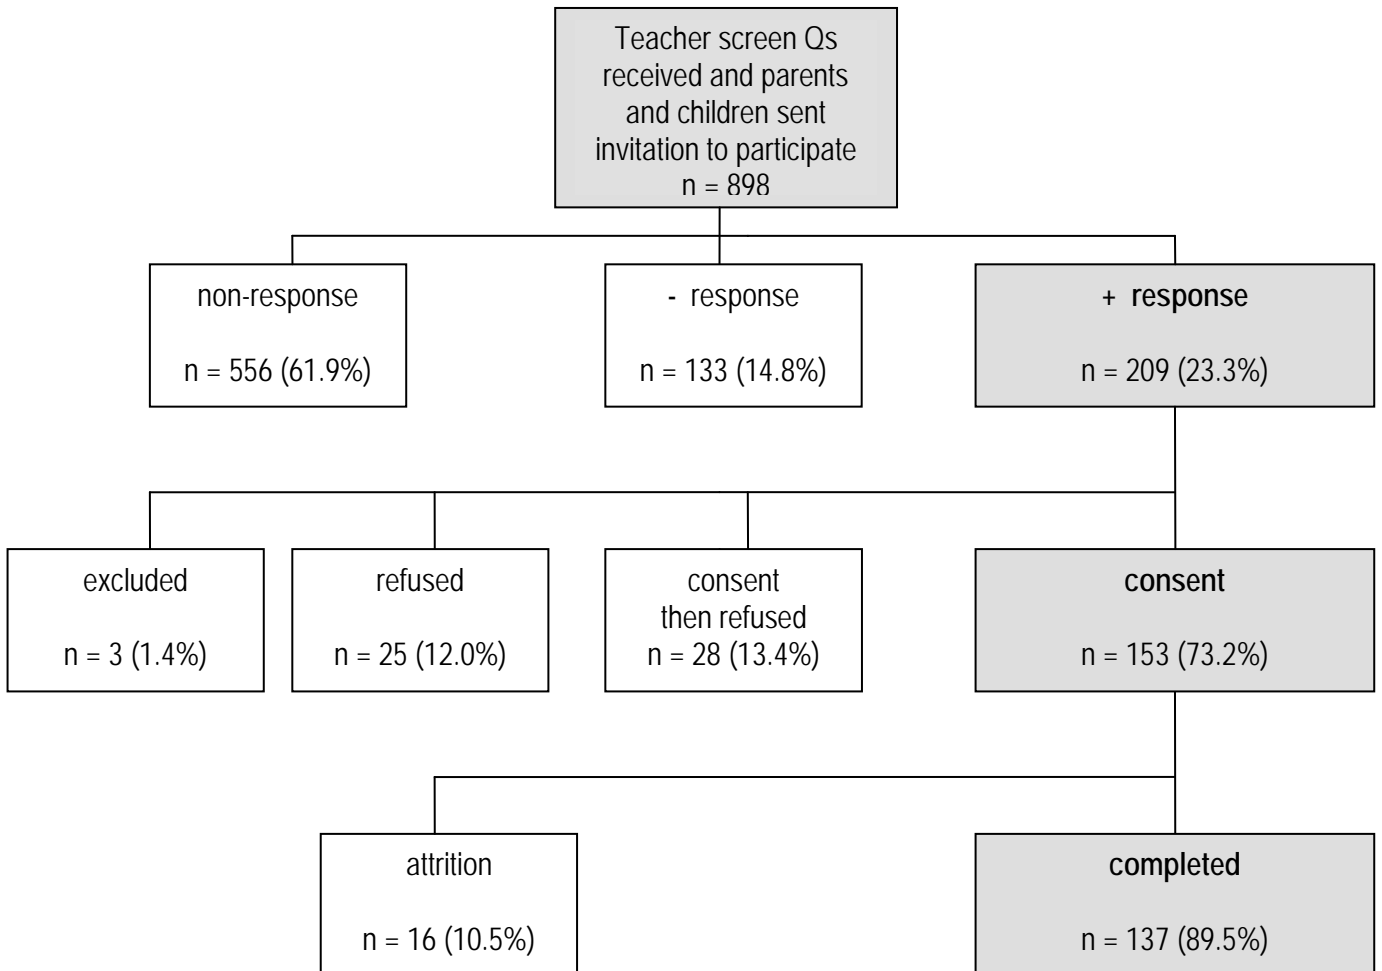

Supplement: ajp_167_09_1108_02.pdf [file ajp_167_09_1108_02.pdf]

**Figure S2.** CONSORT diagram of enlistment of 8 to 9 year old participants

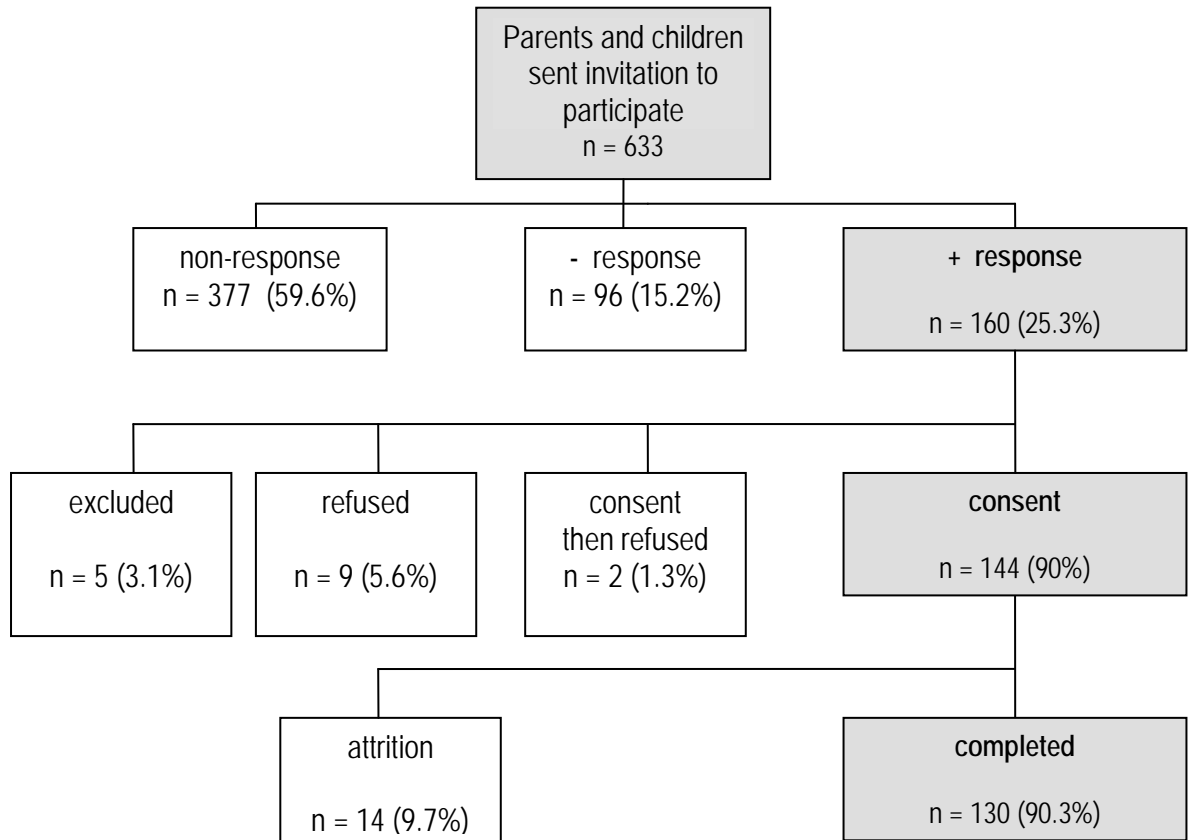

Supplement: ajp_167_09_1108_03.pdf [file ajp_167_09_1108_03.pdf]
